# Supplementary material for: Encapsulation of haloalkane 1-(3-chlorophenyl)-4-(3-chloropropyl)-piperazinium in symmetrical α,α′,δ,δ′-tetramethyl-cucurbit[6]uril
Source: Royal Society of Chemistry journal article supplement (doi:10.1039/c5cp00152h), 2015-01-01
Supplement: c5cp00152h1.pdf [file c5cp00152h1.pdf]

## Supporting Information

### **Encapsulation of haloalkane 1-(3-Chlorophenyl)-4-(3-chloropropyl)-piperazinium in symmetrical $\alpha,\alpha',\delta,\delta'$ -tetramethyl-cucurbit[6]uril**

Xin Xiao,<sup>a</sup> Zhong-Zheng Gao,<sup>a</sup> Cheng-Long Shan,<sup>b</sup> Zhu Tao\*,<sup>a</sup> Qian-Jiang Zhu,<sup>a</sup> Sai-Feng Xue,<sup>a</sup> Jing-Xin Liu\*<sup>b</sup>

<sup>a</sup> Key Laboratory of Macrocyclic and Supramolecular Chemistry of Guizhou Province, Guizhou University, Guiyang 550025, P. R. China;

<sup>b</sup> College of Chemistry and Chemical Engineering, Anhui University of Technology, Maanshan 243002, P. R. China;

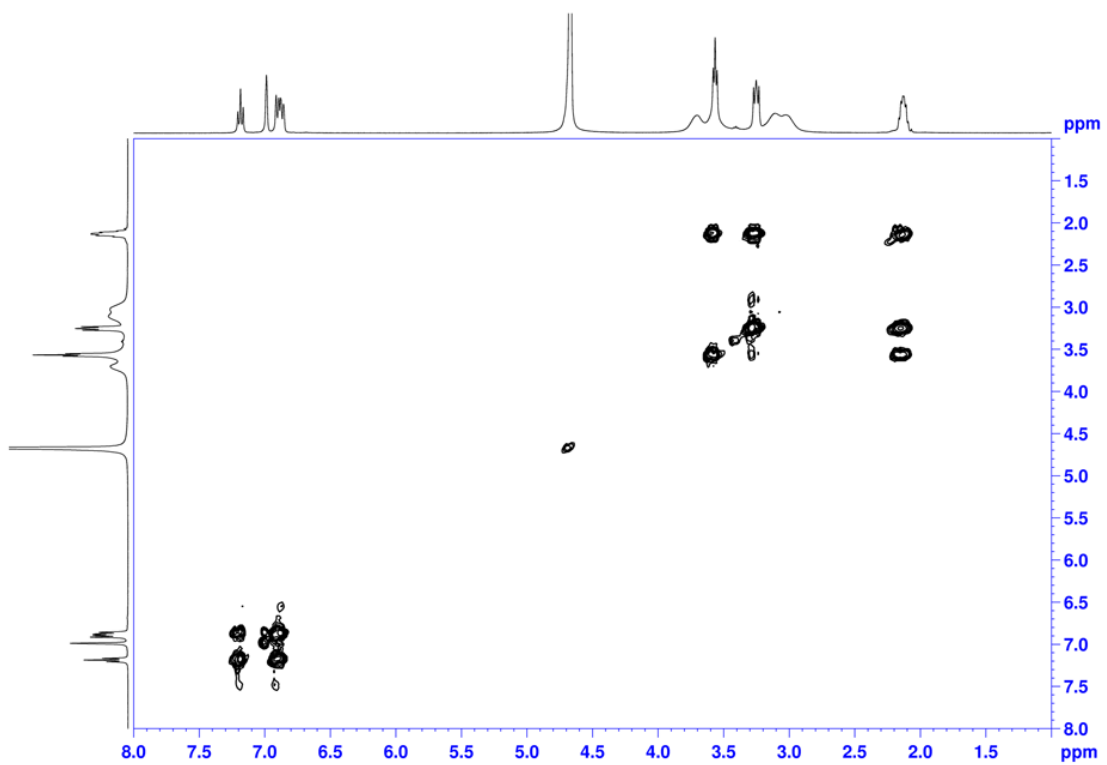

Figure S1  $^1\text{H}$ - $^1\text{H}$  COSY NMR spectra (400 MHz,  $\text{CDCl}_3$ ,  $25^\circ\text{C}$ ) of the guest  $\text{PZ}^+$ .

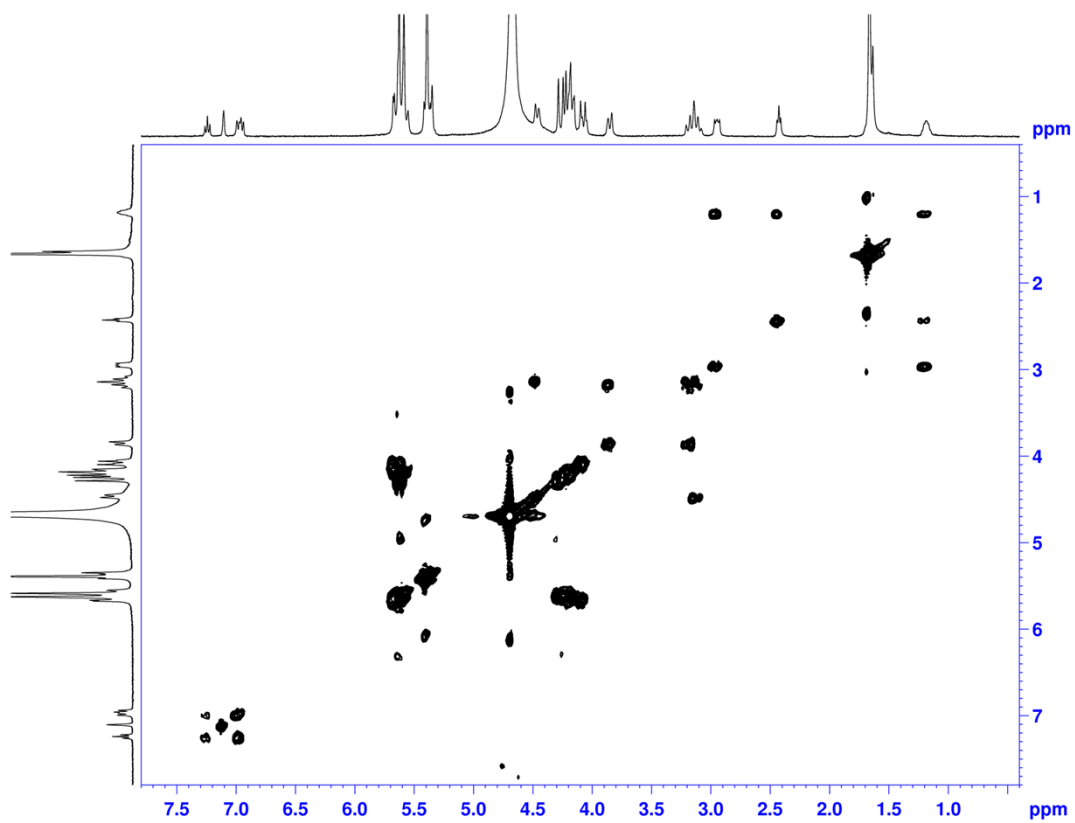

Figure S1  $^1\text{H}$ - $^1\text{H}$  COSY NMR spectra (400 MHz,  $\text{CDCl}_3$ ,  $25^\circ\text{C}$ ) of the inclusion complex  $\text{PZ}^+\text{@TMeQ}[6]$ .
